# Supplementary material for: Transparent Nb-doped TiO2 films with the [001] preferred orientation for efficient photocatalytic oxidation performance
Source: Royal Society of Chemistry journal article supplement (doi:10.1039/c7dt03057f), 2017-01-01
Supplement: c7dt03057f1.pdf [file c7dt03057f1.pdf]

## Electronic Supplementary Information

# Transparent Nb-doped TiO<sub>2</sub> Film with [001] Preferred Orientation for Efficient Photocatalytic Oxidation Performance

Lina Kong<sup>a</sup>, Changhua Wang<sup>b</sup>, Fangxu Wan<sup>b</sup>, Lan Li<sup>a</sup>, Xintong Zhang<sup>\* b</sup>, Yichun Liu<sup>b</sup>

<sup>a</sup> *Institute of Material Physics, Key Laboratory of Display Materials and Photoelectric Devices of Ministry of Education, Key Laboratory for Optoelectronic Materials and Devices of Tianjin, College of Materials Science and Engineering, Tianjin University of Technology, Tianjin 300191, China*

<sup>b</sup> *Center for Advanced Optoelectronic Functional Materials Research, and Key Laboratory of UV-Emitting Materials and Technology of Ministry of Education, Northeast Normal University, 5268 Renmin Street, Changchun 130024, China*

\* E-mail: [xtzhang@nenu.edu.cn](mailto:xtzhang@nenu.edu.cn); Tel: +86 431 85099772

### **Table of Contents**

|           |    |
|-----------|----|
| Figure S1 | S2 |
| Figure S2 | S3 |
| Table S1  | S4 |
| Figure S3 | S5 |
| Figure S4 | S6 |

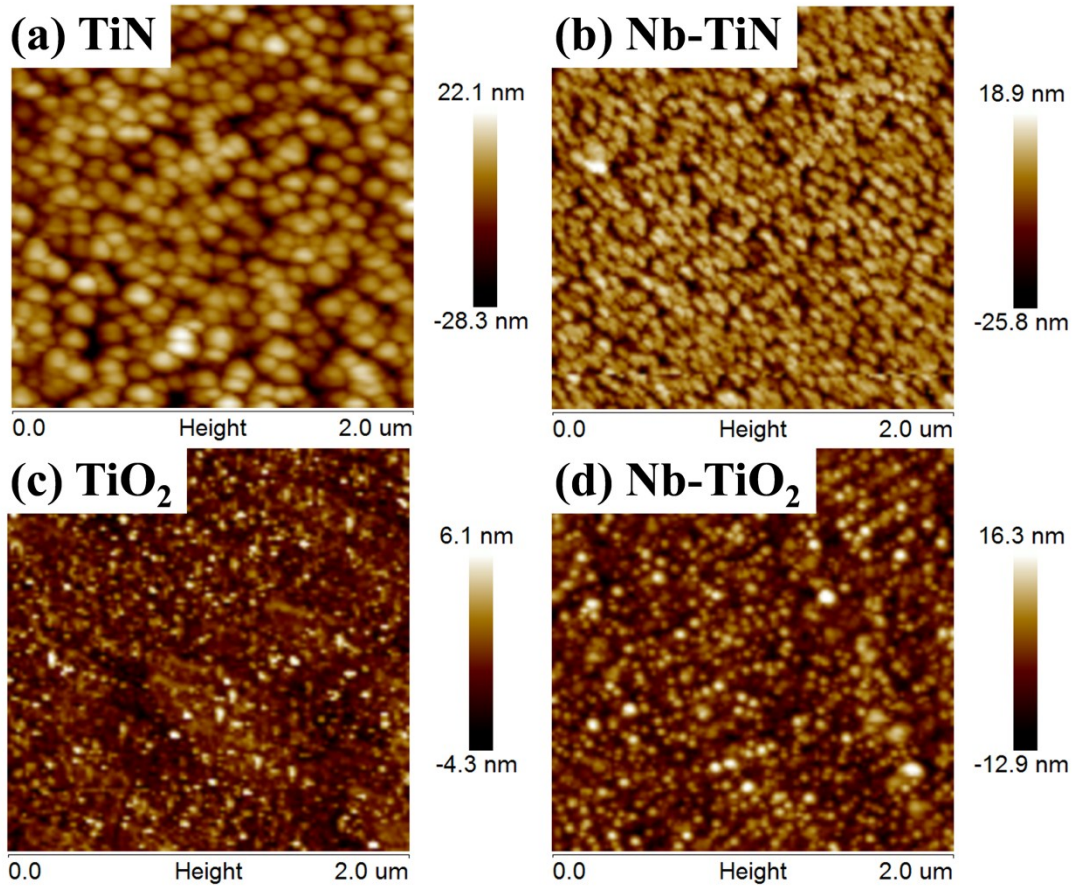

Figure S1. (a)-(d) AFM surface-height topographic maps of the TiN, Nb-TiN, TiO<sub>2</sub>-600 °C, and Nb-TiO<sub>2</sub>-600 °C films.

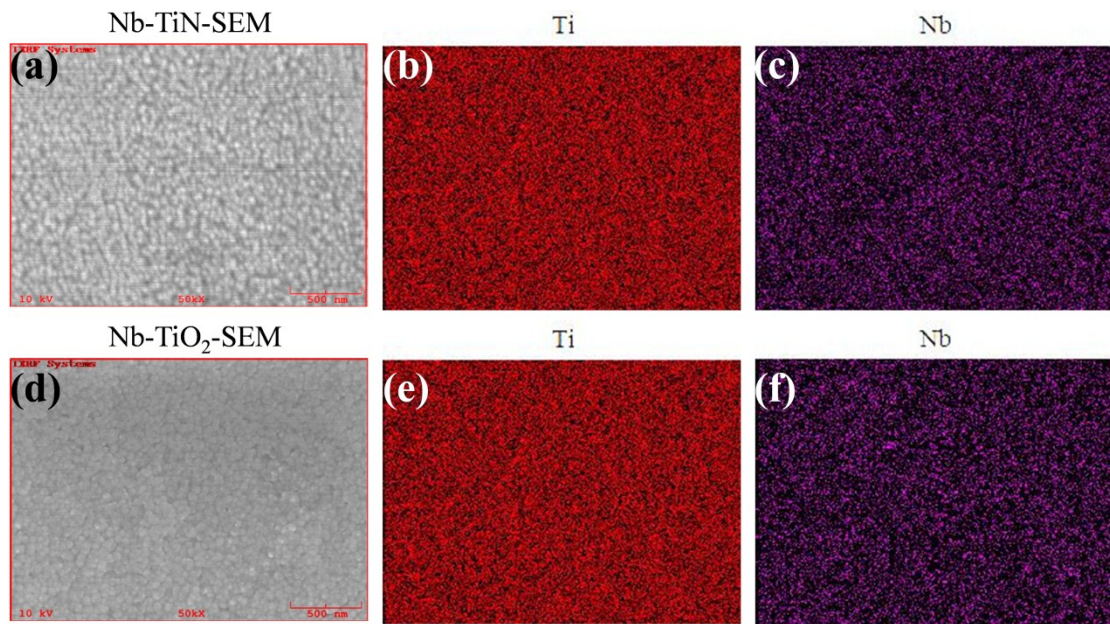

Figure S2. (a) and (d) SEM images of the surface section of the Nb-TiN and Nb-TiO<sub>2</sub>-600 °C films, respectively; (b), (c), (e), and (f) EDS mapping of the Ti and Nb elements in Nb-TiN and Nb-TiO<sub>2</sub>-600 °C films.

Table S1. Quantic measured atomic percentage of niobium relative to the total titanium and niobium contained in the Nb-TiN and Nb-TiO<sub>2</sub> samples detected by SEM-EDS.

| <b>Nb/(Ti+Nb)</b>           | <b>Test 1</b> | <b>Test 2</b> | <b>Test 3</b> | <b>Test 4</b> | <b>Test 5</b> | <b>Average</b> |
|-----------------------------|---------------|---------------|---------------|---------------|---------------|----------------|
| Nb-TiN                      | 18.8%         | 18.1%         | 18.7%         | 18.3%         | 17.8%         | 18.3%          |
| Nb-TiO <sub>2</sub> -400 °C | 18.8%         | 18.2%         | 19.0%         | 19.0%         | 19.8%         | 19.0%          |
| Nb-TiO <sub>2</sub> -500 °C | 18.5%         | 18.8%         | 18.6%         | 18.6%         | 18.2%         | 18.6%          |
| Nb-TiO <sub>2</sub> -600 °C | 18.7%         | 18.3%         | 18.8%         | 18.9%         | 19.0%         | 18.7%          |
| Nb-TiO <sub>2</sub> -800 °C | 18.8%         | 19.4%         | 18.9%         | 18.6%         | 18.9%         | 18.9%          |

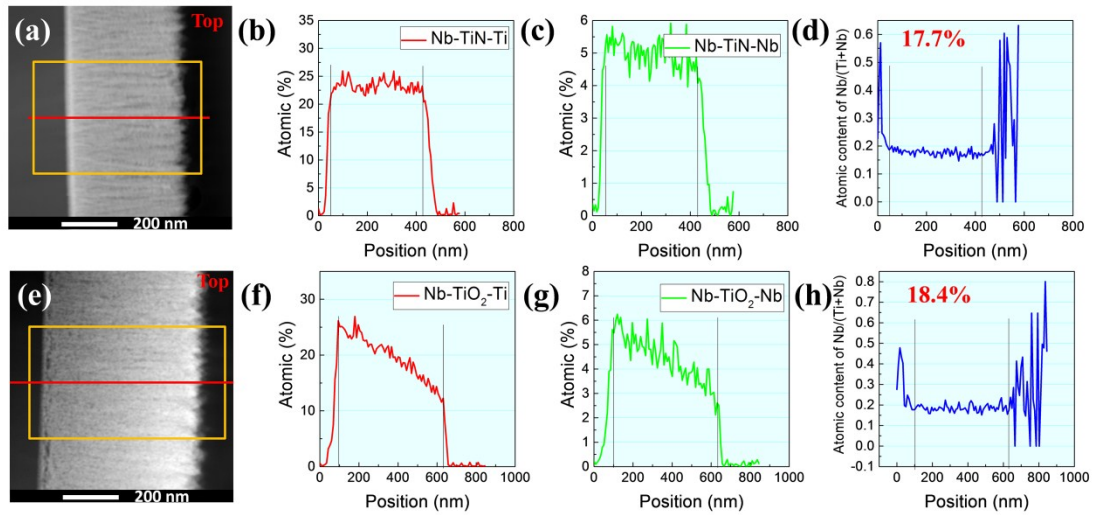

Figure S3. (a) and (e) Cross-sectional TEM images of the Nb-TiN and Nb-TiO<sub>2</sub>-600 °C films, respectively. (b), (c), (f), and (g) TEM-EDS line-scan analysis of the Ti and Nb elemental distribution of the cross-section of the Nb-TiN and Nb-TiO<sub>2</sub>-600 °C films. (d) and (h) Calculated curves of the atomic ratios of Nb/(Ti+Nb) for the Nb-TiN and Nb-TiO<sub>2</sub>-600 °C films, respectively. (The together decrease of the content of the Ti and Nb in (f) and (g) was attributed to the decreased thickness of the film section from the bottom to the top during the cross-sectional TEM sample preparation process.)

A Nb-TiN film without orientation was formed on the quartz substrate using the DC radiofrequency (Rf) sputtering strategy. The DC electricity was set at 0.32 A. The sputtering pressure was centered at 1 Pa with gaseous mixture of Ar and N<sub>2</sub> in a 1:1 ratio. The Nb-TiO<sub>2</sub> film without a [001] preferred orientation was prepared by annealing of the Nb-TiN film without orientation at 600 °C for 2 h under ambient conditions. Finally, the Nb-TiO<sub>2</sub> film was anatase TiO<sub>2</sub> without a preferred orientation and a cross-section of approximately 240 nm.

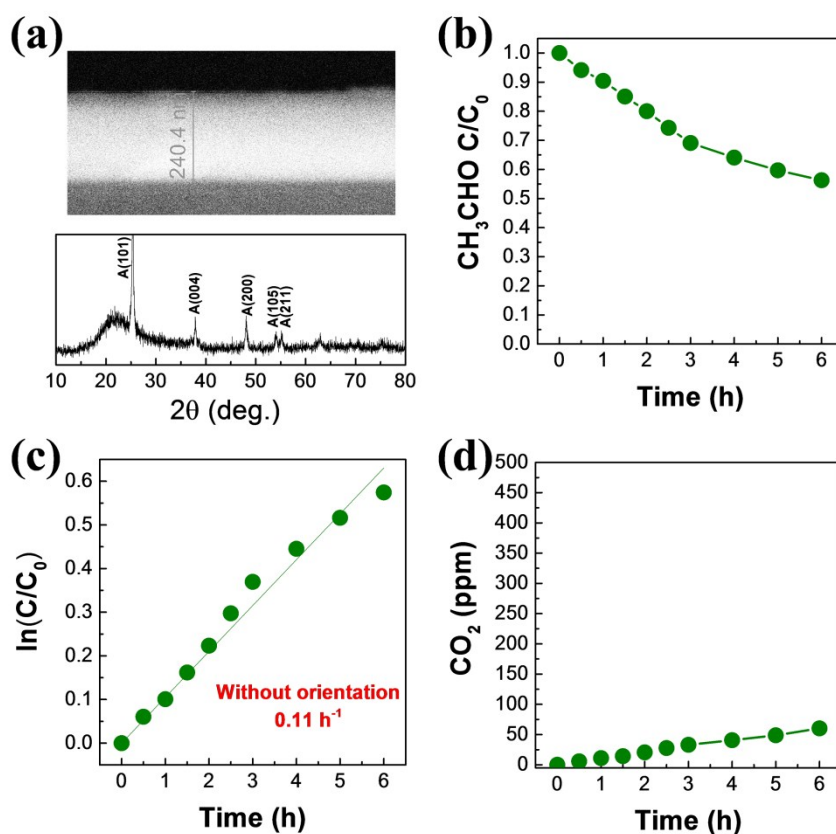

Figure S4. (a) SEM and XRD patterns of the Nb-TiO<sub>2</sub> film without a [001] preferred orientation, (b) photocatalytic degradation curves, (c) degradation kinetic curves, and (d) generation of CO<sub>2</sub> over the Nb-TiO<sub>2</sub> film under simulated sunlight irradiation (350-700 nm).
